# Supplementary material for: A novel inflammation-related signature for predicting prognosis and characterizing the tumor microenvironment in colorectal cancer
Source: publisher site journal article supplement (doi:10.18632/aging.204630), 2023-04-02
Supplement: Supplementary file [file aging-v15i7-204630-supplementary-material-SD4.pdf]

**SUPPLEMENTARY TABLES**

**Supplementary Table 3. Univariate Cox regression analyses of clinical information with the overall survival of CRC patients.**

| <b>TCGA dataset</b> |                              |               |                |
|---------------------|------------------------------|---------------|----------------|
| <b>Variable</b>     | <b>Univariate regression</b> |               |                |
|                     | <b>HR</b>                    | <b>95% CI</b> | <b>p Value</b> |
| Risk score          | 3.8334                       | 2.3288–6.3101 | 0.0000         |
| Pathologic_stage    | 2.0305                       | 1.5438–2.6708 | 0.0000         |
| Pathologic_T        | 2.5614                       | 1.5665–4.1880 | 0.0002         |
| Pathologic_N        | 1.9038                       | 1.4319–2.5313 | 0.0000         |
| Pathologic_M        | 3.2602                       | 1.9388–5.4824 | 0.0000         |
| TP53_mutation       | 1.8464                       | 1.0562–3.2278 | 0.0314         |
| KRAS_mutation       | 0.8982                       | 0.5611–1.4381 | 0.6549         |
| BRAF_mutation       | 1.2109                       | 0.6353–2.3080 | 0.5608         |

  

| <b>GSE39582 dataset</b> |                              |               |                |
|-------------------------|------------------------------|---------------|----------------|
| <b>Variable</b>         | <b>Univariate regression</b> |               |                |
|                         | <b>HR</b>                    | <b>95% CI</b> | <b>p Value</b> |
| Risk score              | 1.5919                       | 1.1676–2.1702 | 0.0033         |
| Pathologic_stage        | 1.9919                       | 1.5290–2.5949 | 0.0000         |
| Pathologic_T            | 1.7872                       | 1.2300–2.5968 | 0.0023         |
| Pathologic_N            | 1.5973                       | 1.2601–2.0248 | 0.0001         |
| Pathologic_M            | 4.6461                       | 2.9194–7.3941 | 0.0000         |
| TP53_mutation           | 1.2812                       | 0.8645–1.8987 | 0.2171         |
| KRAS_mutation           | 1.2408                       | 0.8407–1.8315 | 0.2773         |
| BRAF_mutation           | 1.5943                       | 0.8515–2.9852 | 0.1449         |

**Supplementary Table 4. Univariate and multivariate Cox regression analyses of the IRG risk score in GSE39582 datasets with the overall survival of CRC patients.**

| <b>GSE39582 dataset</b> |                              |               |                |                                |               |                |
|-------------------------|------------------------------|---------------|----------------|--------------------------------|---------------|----------------|
| <b>Variable</b>         | <b>Univariate regression</b> |               |                | <b>Multivariate regression</b> |               |                |
|                         | <b>HR</b>                    | <b>95% CI</b> | <b>p Value</b> | <b>HR</b>                      | <b>95% CI</b> | <b>p Value</b> |
| Risk score              | 1.5919                       | 1.1676–2.1702 | 0.0033         | 1.3746                         | 1.0119–1.8670 | 0.0418         |
| Pathologic_stage        | 1.9919                       | 1.5290–2.5949 | 0              | 0.9004                         | 0.4943–1.6400 | 0.7319         |
| Pathologic_T            | 1.7872                       | 1.2300–2.5968 | 0.0023         | 1.2692                         | 0.8539–1.8860 | 0.2384         |
| Pathologic_N            | 1.5973                       | 1.2601–2.0248 | 0.0001         | 1.3186                         | 0.8702–0.8702 | 0.1922         |
| Pathologic_M            | 4.6461                       | 2.9194–7.3941 | 0              | 3.8438                         | 1.6796–8.7970 | 0.0014         |

**Supplementary Table 6. The RT-qPCR primer sequences and antibodies were used in this article.**

| <b>The RT-qPCR primer sequences</b> |                          |                          |
|-------------------------------------|--------------------------|--------------------------|
| <b>Gene</b>                         | <b>Forward primer</b>    | <b>Reverse primer</b>    |
| <i>ITGAX (CD11c)</i>                | AGAGCTGTGATAAGCCAGTTCC   | AATTCCTCGAAAGTGAAGTGTGT  |
| <i>CD80</i>                         | GGCCCGAGTACAAGAACCG      | TCGTATGTGCCCTCGTCAGAT    |
| <i>ARG1</i>                         | GTGGAAACTTGCATGGACAAC    | AATCCTGGCACATCGGGAATC    |
| <i>CD163</i>                        | TTTGTCAACTTGAGTCCCTTAC   | TCCCGCTACACTTGTTTTAC     |
| <i>TIMP1</i>                        | ACCACCTTATACCAGCGTTATGA  | GGTGTAGACGAACCGGATGTC    |
| <i>18S</i>                          | GCAGAATCCACGCCAGTACAAGAT | TCTTCTTCAGTCGCTCCAGGTCTT |
| <i>ARPC1B</i>                       | CAAGGACCGCACCCAGATT      | TGCCGCAGGTCACAATACG      |
| <i>C5</i>                           | ACAGTCATAGAGTCTACAGGTGG  | CCAACTGGTCAAGCGAATCTT    |
| <i>CCL1</i>                         | CTCATTTGCGGAGCAAGAGAT    | GCCTCTGAACCCATCCAACCTG   |
| <i>CCL2</i>                         | AGAATCACCAGCAGCAAGTGTCC  | TCCTGAACCCACTTCTGCTTGG   |
| <i>CCL3</i>                         | AGTTCTCTGCATCACTTGCTG    | CGGCTTCGCTTGGTTAGGAA     |
| <i>CCL4</i>                         | CTGTGCTGATCCCAGTGAATC    | TCAGTTCAGTTCAGGTCATACA   |
| <i>CCL5</i>                         | CCTGCTGCTTTGCCTACATTGC   | ACACACTTGGCGGTTCTTTCCGG  |
| <i>CD40LG</i>                       | ACATACAACCAAACCTTCTCCCG  | GCAAAAAGTGCTGACCCAATCA   |
| <i>CXCL1</i>                        | AGCTTGCCCTCAATCCTGCATCC  | TCCTTCAGGAACAGCCACCAGT   |
| <i>CXCL10</i>                       | GGTGAGAAGAGATGTCTGAATCC  | GTCCATCCTTGAAGCACTGCA    |
| <i>CXCL11</i>                       | GACGCTGTCTTTGCATAGGC     | GGATTTAGGCATCGTTGTCCTTT  |
| <i>CXCL12</i>                       | ATTCTCAACACTCCAAACTGTGC  | ACTTTAGCTTCGGGTCAATGC    |
| <i>G-CSF</i>                        | GCTGCTTGAGCCAACCTCCATA   | GAACGCGGTACGACACCTC      |
| <i>GM-CSF</i>                       | TCCTGAACCTGAGTAGAGACAC   | TGCTGCTTGTAGTGGCTGG      |
| <i>ICAM1</i>                        | ATGCCCAGACATCTGTGTCC     | GGGGTCTCTATGCCCAACAA     |
| <i>IFNG</i>                         | GAGTGTGGAGACCATCAAGGAAG  | TGCTTTGCGTTGGACATTCAAGTC |
| <i>IL10</i>                         | TCTCCGAGATGCCTTCAGCAGA   | TCAGACAAGGCTTGGCAACCCA   |
| <i>IL12</i>                         | CCTTGCACCTTCTGAAGAGATTGA | ACAGGGCCATCATAAAAGAGGT   |
| <i>IL13</i>                         | CCTCATGGCGCTTTTGTTGAC    | TCTGGTTCTGGGTGATGTTGA    |
| <i>IL16</i>                         | GCCGAAGACCCTTGGGTTAG     | GCTGGCATTGGGCTGTAGA      |
| <i>IL17a</i>                        | TCCCACGAAATCCAGGATGC     | GGATGTTCAAGGTTGACCATCAC  |
| <i>IL18</i>                         | TCTTCATTGACCAAGGAAATCGG  | TCCGGGGTGCATTATCTCTAC    |
| <i>IL1a</i>                         | TGGTAGTAGCAACCAACGGGA    | ACTTTGATTGAGGGCGTCATTC   |
| <i>IL1b</i>                         | CCACAGACCTTCCAGGAGAATG   | GTGCAGTTCAGTGATCGTACAGG  |
| <i>IL1ra</i>                        | CATTGAGCCTCATGCTCTGTT    | CGCTGTCTGAGCGGATGAA      |
| <i>IL2</i>                          | AACTCCTGTCTTGCATTGCAC    | GCTCCAGTTGTAGCTGTGTTT    |
| <i>IL21</i>                         | TAGAGACAAACTGTGAGTGGTCA  | GGGCATGTTAGTCTGTGTTTCTG  |
| <i>IL25</i>                         | CAGGTGGTTGCATTCTTGGC     | GAGCCGGTTCAAGTCTCTGT     |
| <i>IL27/</i>                        | ACCGCTTTGCGGAATCTCA      | AGGTCAGGGAAACATCAGGGA    |
| <i>IL32a</i>                        | TGGCGGCTTATTATGAGGAGC    | CTCGGCACCGTAATCCATCTC    |
| <i>IL4</i>                          | CCAACCTGCTTCCCCCTCTG     | TCTGTTACGGTCAACTCGGTG    |
| <i>IL5</i>                          | TGGAGCTGCCTACGTGTATG     | TTCGATGAGTAGAAAGCAGTGC   |
| <i>IL6</i>                          | AGACAGCCACTCACCTCTTCAG   | TTCTGCCAGTGCCTCTTTGCTG   |
| <i>IL8</i>                          | ACTGAGAGTGATTGAGAGTGGAC  | AACCCTCTGCACCCAGTTTTT    |
| <i>SerpineE1</i>                    | ACCGCAACGTGGTTTTCTCA     | TTGAATCCCATAGCTGCTTGAAT  |
| <i>TNFa</i>                         | CCTCTCTCTAATCAGCCCTCTG   | GAGGACCTGGGAGTAGATGAG    |
| <i>TREM1</i>                        | GAACCTCCGAGCTGCAACTAAA   | TCTAGCGTGTAGTCACATTTTAC  |
| <i>ATF3</i>                         | CGCTGGAATCAGTCACTGTCAG   | CTTGTTTCGGCACTTTGCAGCTG  |
| <i>IRF2</i>                         | CATGCGGCTAGACATGGGTG     | GCTTTCCTGTATGGATTGCC     |

|              |                        |                        |
|--------------|------------------------|------------------------|
| <i>CEBPA</i> | AGGAGGATGAAGCCAAGCAGCT | AGTGCGCGATCTGGAACTGCAG |
| <i>CEBPB</i> | CTTCAGCCCGTACCTGGAG    | GGAGAGGAAGTCGTGGTGC    |

---

**The antibodies**

---

| <b>Antibody</b>    | <b>Identifier</b> |
|--------------------|-------------------|
| Anti-p Erk1/2      | 4370              |
| Anti-Erk1/2        | 4695              |
| Anti-CCL2          | ab214819          |
| Anti-ICAM1         | ab282575          |
| Anti-TIMP1         | 16644-1-AP        |
| Anti-GAPDH         | ab8245            |
| ERK1/2 inhibitor 1 | HY-112287         |

---
