# Supplementary material for: A novel inflammation-related signature for predicting prognosis and characterizing the tumor microenvironment in colorectal cancer
Source: Aging (Albany NY). 2023 Apr 2;15(7):2554–81. doi: 10.18632/aging.204630 (PMC10120913; doi:10.18632/aging.204630)
Supplement: Supplementary Table 2 [file aging-15-204630-s003.xlsx]

## Sheet: Sheet1
Supplementary Table 2. Univariate Cox regression analyses and differentially expressed genes among IRGs in the TCGA dataset.
TCGA-DEGs				TCGA- univariate COX						Overlapping gene of IRGs in TCGA dataset
Gene	logFC	adj.P.Val		Gene	HR	low95	high95	p-value		TIMP1
DPEP1	4.64896	5.6122e-43		IL20RB	1.94705	1.50742	2.51491	3.34279e-07		FABP4
SLC4A4	-3.99247	1.19947e-113		CYP19A1	13.5184	3.11058	58.7504	0.000513153		SCG2
VIP	-3.30991	2.98814e-55		TIMP1	1.45307	1.16492	1.8125	0.000921125		MMP3
MMP3	3.02033	1.98056e-26		BCL6	1.58888	1.18872	2.12375	0.00176161		C2CD4A
CXCL8	2.75797	4.51411e-22		GPRC5B	1.54424	1.17036	2.03755	0.00212497		CD36
CXCL1	2.74799	1.20463e-34		UCN	1.59235	1.18207	2.14502	0.00221117		AOC3
CCL21	-2.71167	3.57949e-25		S1PR3	1.58381	1.17616	2.13275	0.00245668		CLU
LRRC19	-2.66793	7.16981e-50		CCRL2	0.641007	0.476428	0.862439	0.00330882		CXCL1
MEP1A	-2.5189	4.42467e-22		FABP4	1.18642	1.05844	1.32988	0.00333407		F2RL1
KLF4	-2.50364	1.04926e-54		NOS2	0.835879	0.741423	0.942369	0.00338774		SLC4A4
SPP1	2.48328	4.28815e-14		SCG2	1.36748	1.10639	1.69018	0.00378802		APOD
CLU	-2.47928	3.15715e-37		TACR3	5.00884e+08	537.507	466755983942956	0.00428405		CCL24
CXCL3	2.4189	1.5253e-33		MFHAS1	0.659505	0.495423	0.877932	0.00434604		C2CD4B
CCL19	-2.32203	2.672e-27		XCL1	1.63734	1.15893	2.31323	0.00516543		DNASE1L3
FABP4	-2.27029	4.30384e-31		NFATC4	1.64315	1.15638	2.33481	0.00559632		EREG
REG3A	2.2684	4.72209e-07		LEP	1.63125	1.15293	2.30803	0.00571594		PTGIS
C2CD4A	2.25336	3.33343e-31		CCL22	0.689962	0.527501	0.902458	0.0067447		CXCL3
DNASE1L3	-2.25264	1.75721e-64		ABCD1	1.45663	1.10874	1.91368	0.00690726		CCL11
AOC3	-2.24323	1.66517e-36		MMP3	0.875265	0.79382	0.965065	0.00750535		CXCL2
IL6R	-2.18292	7.59577e-95		ADIPOQ	1.31461	1.07459	1.60824	0.00782781		SIGLEC1
PLP1	-2.16842	1.06851e-176		AP3B1	0.633959	0.451971	0.889224	0.00828977
ACKR1	-2.16396	2.12542e-36		LAT	5.30879	1.53058	18.4135	0.00852005
PTGS1	-2.15702	1.70069e-63		WNT5A	0.727157	0.573336	0.922246	0.00860234
FOLR2	-2.11015	2.06404e-35		C2CD4A	0.824836	0.714435	0.952297	0.00862268
CHI3L1	2.07828	1.20164e-25		CD36	1.39872	1.08488	1.80335	0.00964284
INHBA	2.04672	2.17937e-34		AOC3	1.22242	1.0498	1.42342	0.0097178
TIMP1	2.03416	3.08415e-54		CX3CL1	1.27816	1.06012	1.54105	0.0101191
PTN	-2.01951	1.11641e-73		ADAM8	1.27658	1.05906	1.53877	0.010407
IL1R2	-1.95143	7.22802e-32		NR1D1	1.39448	1.08055	1.79962	0.0106094
CCL13	-1.94685	8.47348e-26		SERPINA1	0.863899	0.771548	0.967303	0.0112036
MEP1B	-1.93097	1.72543e-71		LTB4R	1.37693	1.07526	1.76325	0.0112439
MYC	1.91162	1.59346e-46		HYAL1	0.797292	0.668985	0.950207	0.01139
IFITM1	1.89989	7.90082e-32		CLU	1.20052	1.04175	1.38348	0.0115647
PDCD4	-1.84867	1.48863e-64		GABBR1	1.35596	1.06886	1.72016	0.0121218
CXCL2	1.84572	1.9898e-20		CXCL1	0.852227	0.751733	0.966157	0.0124977
LPAR1	-1.79101	3.5257e-62		F2RL1	0.701118	0.528777	0.929628	0.0136275
CXCL5	1.74818	2.5185e-10		SLC4A4	0.760512	0.611457	0.945902	0.0139073
SCG2	-1.71782	6.74587e-44		TNFRSF11A	0.764562	0.617131	0.947213	0.014044
CASP5	-1.69517	2.70581e-27		TRPV4	1.52376	1.08613	2.13772	0.0147587
BMP2	-1.69096	5.40395e-38		CRH	9.94727	1.55283	63.7211	0.0153341
CMA1	-1.69048	9.40373e-104		IGF1	2.42604	1.1795	4.98995	0.0160116
AGT	1.6849	2.33725e-22		HAMP	2.37454	1.17422	4.80183	0.0160851
CD36	-1.66693	2.36259e-58		WDR83	1.62478	1.09195	2.41761	0.0166755
MET	1.66453	6.26449e-50		IL17D	1.72776	1.10384	2.70435	0.0167504
AHCY	1.64968	3.20162e-45		APOD	1.15186	1.02546	1.29384	0.0171311
CXCL11	1.63547	1.51534e-12		IRF7	1.30299	1.04719	1.62128	0.017622
TXNIP	-1.62309	4.96744e-26		CCL24	0.875376	0.783604	0.977896	0.0184962
SERPINE1	1.62285	4.56973e-16		PBK	0.795097	0.656637	0.962754	0.0188343
EREG	1.574	4.36385e-10		NOX4	1.57456	1.06997	2.31713	0.021276
CCL24	1.57048	1.05394e-10		C2CD4B	0.836287	0.717927	0.974161	0.0216649
MXD1	-1.55894	4.30566e-38		DNASE1L3	0.716109	0.537805	0.953529	0.0222725
RGS16	1.55884	2.32603e-30		TNIP3	0.490036	0.265054	0.905987	0.0229152
CCL23	-1.55392	5.94069e-90		PTGER2	0.777603	0.625521	0.966661	0.0234925
CXCL13	-1.55311	1.55989e-13		EREG	0.881173	0.789501	0.98349	0.0240084
LY6E	1.53608	3.5747e-15		PTGES	1.21628	1.02596	1.4419	0.0241227
PTGDR	-1.5321	4.02243e-30		GP1BA	2.05733	1.09469	3.86651	0.0250264
CCL8	-1.52032	1.21548e-28		PTGIS	1.23005	1.02538	1.47558	0.0257575
APPL2	-1.48988	2.25342e-67		CXCL3	0.848877	0.73407	0.981639	0.0271105
CEBPB	1.46764	6.96975e-35		IL1RL2	1.36331	1.03413	1.79728	0.0279531
TNFSF9	1.45226	1.29806e-13		CEBPA	0.804616	0.661773	0.978292	0.0292532
PTGER4	-1.43336	3.61554e-35		RPS6KA5	0.384287	0.161857	0.912392	0.0301748
PLA2G2A	-1.4324	0.000352479		CCL11	0.839383	0.716387	0.983497	0.0303262
C1QA	-1.4257	7.53268e-15		IFNGR1	0.732856	0.551985	0.972992	0.0316106
LIF	1.40948	8.29815e-31		NFKB2	1.41141	1.03014	1.93379	0.031971
CD48	-1.40592	9.86806e-28		CXCL2	0.854791	0.739353	0.988253	0.0340402
NR1H4	-1.4005	1.79797e-53		SEMA4D	1.71994	1.03749	2.8513	0.0354933
DUOXA2	1.39795	1.20917e-06		GPR33	7.07086e-05	8.49731e-09	0.588387	0.037975
CXCL10	1.39429	4.48556e-08		SIGLEC1	1.31124	1.01364	1.69622	0.0391048
TLR3	-1.37943	3.54985e-55		EPO	5.17184	1.07861	24.7986	0.0399197
HMOX1	-1.37562	9.26801e-27		CNTF	0.227798	0.0550963	0.941845	0.0410823
CCL20	1.36507	1.79456e-09		TMIGD3	1.54272	1.01627	2.34186	0.0417737
PPBP	1.3564	2.27397e-05		GNAI3	0.589994	0.354786	0.981136	0.0420168
CCL5	-1.34936	9.62871e-13		ADCYAP1	1.63245	1.01097	2.63599	0.0450087
CREB3L3	-1.33939	1.86737e-32		GPR4	1.39244	1.00608	1.92719	0.0458804
HSPD1	1.33812	6.91592e-39		MCPH1	0.631482	0.400347	0.99606	0.048048
GPER1	-1.33797	1.46548e-41		CNR2	3.46439	1.00567	11.9343	0.0489618
SRI	-1.3301	3.13481e-37
KIT	-1.3232	2.29546e-28
RIPK2	1.31516	1.28807e-52
PJA2	-1.31511	1.06557e-39
TNFSF10	-1.28109	8.02844e-29
ZP3	1.2765	1.33667e-26
CD44	1.27466	2.63459e-39
PDE2A	-1.27437	1.96474e-78
PDPN	1.27169	2.19872e-18
MGLL	-1.26721	8.34499e-34
ADAMTS12	1.26394	6.85474e-24
CCL11	-1.2626	1.9283e-12
STAB1	-1.23834	2.17674e-22
CSF1R	-1.2286	2.22184e-15
FFAR4	-1.22158	1.19422e-10
SLC28A2	-1.21931	1.50667e-11
MIF	1.21782	5.62049e-21
PTGIS	-1.21519	5.83317e-17
SCN9A	-1.21515	3.80014e-148
F12	1.20735	1.71618e-21
LXN	-1.19805	3.92638e-23
TSPAN2	-1.19692	4.05641e-16
C2CD4B	1.19525	3.70426e-10
HSP90AB1	1.18781	9.24156e-58
CCL15	-1.17922	6.73577e-28
ITGA2	1.1737	1.86294e-25
GSTP1	1.15862	7.845e-21
IL6ST	-1.14802	1.01184e-29
IL23A	1.14656	1.17748e-17
BACE2	1.14555	1.04576e-21
FOXF1	-1.1448	2.31651e-21
CDKN1A	-1.13962	7.51829e-18
BCL2	-1.13627	7.62608e-42
CD163	-1.13426	5.74111e-11
F2RL1	-1.12864	1.78712e-29
GPR183	-1.11727	1.60092e-15
RARRES2	-1.10902	2.69736e-12
CD14	-1.10745	9.85735e-12
AGTR1	-1.10532	1.5458e-59
SLC7A1	1.10442	1.77609e-26
IL10RA	-1.0868	2.93363e-21
P2RX1	-1.07542	3.85584e-60
PTPRC	-1.07329	2.14048e-13
IRAK2	1.06681	3.11854e-19
IL1RN	1.05817	1.76131e-09
JAM3	-1.04554	1.7711e-26
C1QTNF12	-1.04363	2.37646e-15
ADRM1	1.04062	1.99339e-28
ENPP3	-1.03727	1.31567e-06
EDNRB	-1.03558	3.10023e-27
APOD	-1.02886	2.40815e-06
BMP6	-1.02775	4.30566e-38
C3	-1.02161	1.98661e-05
MMP9	1.02046	6.84849e-06
MMP14	1.01231	1.27252e-12
SIGLEC1	-1.01159	4.0756e-24
PNMA1	-1.00826	1.71759e-18
CNR1	-1.00625	1.86984e-90
AIF1	-1.00283	1.97013e-12
S100A9	1.00089	1.09621e-05
