# Supplementary material for: A novel inflammation-related signature for predicting prognosis and characterizing the tumor microenvironment in colorectal cancer
Source: Aging (Albany NY). 2023 Apr 2;15(7):2554–81. doi: 10.18632/aging.204630 (PMC10120913; doi:10.18632/aging.204630)
Supplement: Supplementary Table 5 [file aging-15-204630-s005.xlsx]

## Sheet: GSE39582-gene
gene	correlation
CYP1B1	0.626311
COMP	0.583463
TIMP1	0.575223
PRICKLE1	0.568313
VAT1	0.565675
TGFB3	0.564452
NOX4	0.555287
OLFML2B	0.553633
KCNE4	0.55203
AEBP1	0.541857
MRAS	0.540937
CERCAM	0.54024
GFPT2	0.53829
NUAK1	0.536139
DPYSL3	0.535968
LAMB2	0.531242
BGN	0.530083
THBS3	0.529684
LAMP5	0.528949
ITGBL1	0.526916
GAS1	0.526515
MAP1A	0.524408
EFEMP2	0.523597
CMTM3	0.523141
PTPN14	0.522552
COL10A1	0.52215
GLIS2	0.520606
PPP1R18	0.520548
SLIT2	0.520474
COL8A2	0.520426
PLEKHO2	0.519872
S1PR3	0.519275
SPOCK1	0.518639
SERPING1	0.518402
MIR100HG	0.51799
NTM	0.517934
FSTL3	0.51789
ISM1	0.517821
JCAD	0.517563
THBS2	0.517157
VEGFC	0.516885
P2RX7	0.51596
C5orf46	0.515278
MSR1	0.515196
TREM2	0.515013
HTR2B	0.513941
PDLIM7	0.513754
CHST11	0.513637
GNAI2	0.513085
PLXND1	0.51277
ISLR	0.511684
PLPP4	0.511321
CLEC11A	0.508108
PEA15	0.507543
FLNA	0.50741
FNDC1	0.507211
MARCO	0.50716
SFRP2	0.506325
PTGIS	0.506115
TUBA1A	0.505345
SFRP4	0.504712
HOPX	0.504574
LTBP3	0.504339
ATP10A	0.503399
MLLT11	0.5032
CAVIN1	0.502895
FGFR1	0.502547
ZFHX4	0.502296
GSDME	0.50176
COL11A1	0.501248
PRKD1	0.500821
ECM2	0.499822
MITF	0.49968
STON1	0.499255
CCDC80	0.49815
ZNF532	0.497946
DEPP1	0.49728
LAYN	0.497275
MRC2	0.497101
KIF26B	0.49692
LINC01094	0.49635
LOC101929122	0.496285
SULF1	0.494129
AMOTL1	0.493448
FCGR1B	0.492271
MAP1B	0.491849
FXYD6	0.491623
COLEC12	0.491473
HLX	0.491137
RAB31	0.491005
COPZ2	0.490996
PSAP	0.490765
FAP	0.490209
BCAT1	0.489814
MGP	0.48975
C1orf162	0.489103
PRDM6	0.488672
CALHM2	0.487616
LOXL1	0.486265
NPR3	0.486009
NOTCH3	0.485782
TNFSF4	0.48517
SLC1A3	0.484892
OLR1	0.484559
EMP3	0.484096
VSIG4	0.483129
EGR2	0.482874
CYS1	0.482439
FRMD6	0.480999
P3H1	0.48086
PPM1M	0.480087
APOE	0.479138
THY1	0.479039
MXRA8	0.478675
TNS1	0.478639
ZFPM2	0.478029
APOC1	0.477746
NNMT	0.477726
TAGLN	0.477321
ACTN1	0.477177
ITGAM	0.47701
VCAN	0.476734
CAVIN3	0.476399
MFGE8	0.476087
TGFB1I1	0.475947
GGT5	0.474099
HMCN1	0.472677
PHLDA3	0.471359
VGLL3	0.470953
GDI1	0.470736
AHNAK2	0.470609
VIM	0.470363
TENM4	0.469397
IGFBP3	0.469049
PLEKHO1	0.468612
SERPINF1	0.468612
EMILIN1	0.467663
P4HA3	0.467298
BOC	0.46728
PRRX1	0.467277
MXRA7	0.466899
ADAM12	0.466841
ITGA5	0.466558
INAFM1	0.466034
SPP1	0.466016
COL5A1	0.465649
CRISPLD1	0.464748
ENOX1	0.464472
CRYAB	0.464113
IFFO1	0.464027
MN1	0.463553
RUNX1T1	0.463461
CTHRC1	0.46342
NAV3	0.463078
GPNMB	0.462489
C20orf194	0.462317
TIMP3	0.461749
HOMER3	0.46159
DACT1	0.461524
LINC01503	0.461095
TRPS1	0.460544
OSCAR	0.46017
MAFB	0.459895
GLI2	0.459424
TGFB1	0.45899
SPARC	0.458908
CCDC88A	0.4587
PLD3	0.458663
TMEM204	0.457429
DACT3	0.457316
MAP3K3	0.457146
NRP1	0.457089
CHST14	0.456235
PACS1	0.456132
MATN3	0.454987
PABPC4L	0.454902
CTSB	0.454017
HTRA1	0.453877
PRELP	0.453807
LINC01279	0.453658
FAM19A5	0.453107
MYL9	0.452903
ARL4C	0.452267
LGALS1	0.452209
FBN1	0.451552
HAVCR2	0.451546
EVL	0.451153
KCND2	0.451043
ACTA2	0.451002
SYDE1	0.450657
KANK2	0.449626
SYNDIG1	0.449173
ASPN	0.448941
COL8A1	0.448763
TRPC1	0.448367
TIMP2	0.448322
HEG1	0.448086
SLC39A13	0.447512
PNMA8A	0.447141
LTBP2	0.447122
AKT3	0.447
SPHK1	0.446878
LAIR1	0.446684
FN1	0.44658
FBXL7	0.446339
LINC02381	0.446105
TUBB6	0.446048
NAP1L3	0.445977
JAM3	0.445539
PDGFRB	0.445323
SCARF2	0.445249
RCN3	0.445018
HCFC1R1	0.444992
COL5A2	0.444841
FOXC2	0.444787
MAGI2-AS3	0.44474
C1R	0.443616
MFAP2	0.443397
SLC27A1	0.44306
PDE1A	0.442997
THBS4	0.442657
MMP14	0.442646
UBE2QL1	0.442486
TPM2	0.442427
MXRA5	0.442105
EHD2	0.4419
FAM20C	0.441518
LRRC15	0.441056
FAM20A	0.440751
PRAF2	0.440398
LMCD1	0.439994
AKAP12	0.439656
DCBLD2	0.439653
MYH10	0.439561
ADGRD1	0.439536
NKX3-2	0.439391
FBLN2	0.438532
PHF1	0.437826
ITGA11	0.437633
SMARCD3	0.437154
COL6A2	0.437074
SERPINH1	0.437001
TUBG2	0.436815
SYT11	0.436753
MSC-AS1	0.436669
VAMP5	0.436128
C5AR1	0.436064
RUNX1-IT1	0.43515
CALU	0.434689
PCOLCE	0.434649
L3HYPDH	0.434492
ANXA6	0.434405
COX7A1	0.434218
TSPAN4	0.433898
C3	0.433856
PKD2	0.433309
AXL	0.433238
GRP	0.432286
HSPB2	0.432237
BNC2	0.432005
FCER1G	0.431924
ITGB5	0.431414
HTRA3	0.431388
BCL6	0.431348
MYO5A	0.431276
SLAMF8	0.431053
PLN	0.430981
CPXM2	0.430681
ATP2B4	0.430222
ITGB2	0.430208
CHST3	0.430134
LHFPL6	0.429787
FGF1	0.429357
CAMSAP2	0.429337
ZBTB47	0.428809
PLBD2	0.428736
RIPOR1	0.428305
PCED1B	0.428072
GADD45B	0.42807
RASSF4	0.428061
UBE2E2	0.42787
FHL3	0.427632
DDR2	0.42753
SPOCD1	0.427233
ARHGEF17	0.426987
PPP1R3C	0.426984
MAP7D1	0.426901
ZBTB4	0.426744
CTSL	0.426525
ADAMTS12	0.426416
ZNF521	0.426206
ADGRA2	0.426131
ENO2	0.425619
APOD	0.425447
FCGR2B	0.424797
TYROBP	0.424675
LRRC32	0.424155
LAPTM5	0.424052
CD99L2	0.423825
TMEM45A	0.423292
ALDH1A3	0.423057
C1orf54	0.422825
ANTXR1	0.422753
C3AR1	0.422606
PILRA	0.422373
TSPYL5	0.422345
WWTR1	0.422313
CHPF	0.421949
CNIH3	0.421858
STAT2	0.421364
MSN	0.421081
PDLIM3	0.421042
DOK5	0.42064
CD163	0.420156
ST3GAL6	0.420082
SYNE1	0.419979
GNB4	0.419903
WISP1	0.41987
CLIP3	0.419643
MMP19	0.419163
PRICKLE2	0.41909
GPSM1	0.418203
HSPG2	0.41793
CLIP4	0.417804
VKORC1	0.417725
CLEC5A	0.417455
MEIS2	0.417274
DZIP1	0.416934
RUNX2	0.41649
ANKRD6	0.416457
CD72	0.416147
HTRA4	0.415444
C3orf80	0.415307
INMT	0.415179
SUSD5	0.415149
COL1A2	0.415001
CLIC4	0.414803
HIC1	0.414187
DIP2C	0.414001
CSF1R	0.413731
RILPL1	0.413546
SH3PXD2B	0.413495
KANK4	0.41283
DCLK1	0.412722
RHOQ	0.412662
ARMCX1	0.412585
NISCH	0.412545
PLA1A	0.412483
FAM229B	0.412237
KCNJ8	0.412076
C1QTNF3	0.411904
CDH11	0.411721
CD84	0.411521
EVA1B	0.411418
OMD	0.411154
ETV5	0.411142
CALHM5	0.411113
TIE1	0.410919
ZNF667	0.410898
LAMC1	0.410808
CDKN1C	0.410464
KLC1	0.410448
INHBA	0.410442
F13A1	0.410426
RASA3	0.410248
PXDC1	0.410116
AOC3	0.40995
SFXN3	0.409936
MPDZ	0.409634
PARVG	0.409598
FUT11	0.40931
GPC6	0.408726
CRIP2	0.408536
KATNAL1	0.408431
LOXL3	0.408386
PDGFRL	0.408342
NAV1	0.408111
LATS2	0.407702
CRABP2	0.407466
IER5L	0.406625
MEOX2	0.40619
CALD1	0.406018
ADAM8	0.405781
GNS	0.405754
ZNF362	0.405566
PCDH7	0.405507
HSPB8	0.404963
SRGAP2C	0.404673
TPST1	0.403025
COL6A1	0.402339
CILP	0.402174
GPR68	0.402107
CRISPLD2	0.4021
CERS5	0.401936
DVL3	0.401857
TSPYL2	0.401372
HEYL	0.400953
TM6SF1	0.400754
VEGFB	0.400413
TSHZ3	0.4004
SLC15A3	0.400354
IGFBP6	0.40025
PIP4K2A	0.399959
ZNF438	0.399708
TLR2	0.399706
CCDC8	0.399519
KLHDC8B	0.399133
MAP4K4	0.399042
LIX1L	0.398827
NOTCH2	0.39867
PDGFC	0.398288
TRIM8	0.397813
C1S	0.397415
APBB1IP	0.397132
CFH	0.396695
HK3	0.396626
LMOD1	0.396588
BICD2	0.396521
CHST15	0.396311
COL3A1	0.396247
S100A4	0.396036
FKBP15	0.396023
COL6A3	0.395673
DENND5A	0.395443
GNB5	0.3953
FERMT2	0.395041
TNFSF13B	0.394478
TTC7B	0.394148
TNFAIP6	0.394075
SDC2	0.393989
JAZF1	0.393912
TMEM43	0.393686
FSTL1	0.393632
ZEB2	0.393615
FZD1	0.393573
UCHL1	0.39355
LEF1-AS1	0.393458
SSH1	0.393433
FAM110B	0.393286
RGS19	0.393138
PHLDB2	0.39302
RBMS3	0.392718
LZTS2	0.392404
FEZ1	0.392373
AP1M1	0.392335
LOC339803	0.392331
ARMCX2	0.392077
FMO2	0.392022
TCF4	0.392016
ITGAX	0.39176
NAGK	0.391612
AMIGO2	0.391544
ZNF667-AS1	0.391375
DBN1	0.391219
COL18A1	0.390989
HEY1	0.390872
CTGF	0.390751
ADAMTS2	0.390513
OLFML1	0.390503
FAM129A	0.390266
NR2F1-AS1	0.390221
SLC2A3	0.390092
ADAMTS6	0.389861
GUCY1B1	0.389729
FYN	0.389598
INHBB	0.389589
C1orf216	0.389588
GXYLT2	0.389348
VASH1	0.389209
GUCY1A1	0.389065
USP11	0.389058
HS3ST2	0.388977
COL16A1	0.388946
POSTN	0.388756
MFAP5	0.388685
CFL2	0.388354
GPC1	0.388104
CD109	0.388089
PLA2G4C	0.388072
NEXN	0.388042
CNN1	0.387539
MICU3	0.387313
LOX	0.386699
LY96	0.386668
LRRC8A	0.386521
PDLIM2	0.3865
CHSY3	0.386417
IL4I1	0.386356
GLT8D2	0.385827
LAT2	0.38574
AGTR1	0.38573
MPRIP	0.385727
LINC01116	0.385445
CYTH3	0.384921
FOXC1	0.384785
FSCN1	0.384171
VGLL4	0.384065
DSE	0.383647
PHF21A	0.383609
PBX3	0.383417
PALLD	0.383125
PIP4K2B	0.382795
EFEMP1	0.382754
FMNL3	0.382681
PCDHB7	0.382621
MEX3B	0.3822
CD276	0.381906
RFTN1	0.381664
NRP2	0.381578
ATP8B2	0.381575
SLITRK4	0.381539
WIPF1	0.381502
HOXB2	0.381498
FST	0.381021
NREP	0.380973
ZNF25	0.380473
SMARCA1	0.380172
IDS	0.380136
TWIST1	0.38013
TRPV2	0.379993
PDE4DIP	0.379816
C1QB	0.379652
GM2A	0.379579
LILRB4	0.379222
PMP22	0.379197
FZD4	0.37893
ENTPD1	0.37786
FABP4	0.377731
PALMD	0.377192
BASP1	0.377057
ENG	0.37677
BICC1	0.376521
PIAS3	0.3761
OLFML3	0.375973
TERF2IP	0.375949
C1QA	0.375918
CYB5R3	0.375793
RRAGD	0.375773
HOXC6	0.375608
PEG3	0.375519
SLC7A7	0.375468
MCEMP1	0.375326
GAL3ST4	0.375061
RBFOX2	0.37476
TRIB2	0.374613
ITPRIP	0.374404
HOXC4	0.374307
HSD11B1	0.374297
CYR61	0.374245
TLN1	0.374204
FGR	0.373459
CCR1	0.373344
CD14	0.373301
SCG2	0.373239
DOK2	0.373002
IGFBP7	0.372906
LINC00702	0.372797
FIBIN	0.372445
PALM	0.371992
SELENOM	0.371947
CNRIP1	0.371451
MAGED2	0.371398
TNS2	0.371381
CPXM1	0.371354
WDFY2	0.37116
ZNF512B	0.37116
ZBED2	0.370983
MRVI1	0.370526
LY86	0.370464
CHST1	0.369698
AIF1	0.369696
GPRASP1	0.369634
PI4K2A	0.36937
GLI3	0.369028
CNPY4	0.368956
TRO	0.368913
SOX11	0.36877
LEF1	0.368723
LDOC1	0.368359
MAF	0.368248
LIMS2	0.367891
RBP7	0.367813
CNTNAP1	0.3675
PIK3CD	0.367116
TFE3	0.367024
PINLYP	0.366643
MOXD1	0.366569
MEIS1	0.366435
PLEKHM2	0.366176
RASSF8	0.366113
CYTH4	0.365959
SYNPO	0.365862
ALPK2	0.365803
GIT2	0.365799
GPR176	0.365559
IGFBP4	0.365319
FRMD4A	0.365222
SIGLEC1	0.365207
RNASE2	0.365107
CDC42EP3	0.364834
WWC3	0.364565
DPYSL2	0.36419
FCGR2A	0.364175
ERMN	0.364042
MYADM	0.364004
ZEB1	0.363953
DTX3	0.363929
MDFIC	0.363647
FAM168A	0.363589
CILP2	0.363461
PTPRM	0.363459
LRRC4C	0.363441
GLRB	0.363163
KIAA0930	0.362619
IQSEC1	0.362092
RNF150	0.362012
THSD7A	0.361974
PLXDC2	0.361879
MGAT1	0.361683
ADAP2	0.361565
CADM1	0.361482
BEAN1	0.361417
ARSI	0.361304
DNM1	0.361298
GYPC	0.360977
PCDH9	0.360901
ZNF469	0.360795
SELPLG	0.360564
KCNMB1	0.36056
TCEAL4	0.360556
GAS7	0.360129
TMEM140	0.360108
CD248	0.359827
PARD6G	0.359808
TREM1	0.359782
TCEAL2	0.359611
ECM1	0.359538
RGS16	0.359415
FAM219A	0.359344
ACTC1	0.359291
LOC100506844	0.359258
ARMH4	0.359173
GPR137B	0.358708
RBMS1	0.358697
FOLR2	0.358477
ZNF365	0.358437
FBXL22	0.358429
TK2	0.358424
FAM198B	0.358323
NCF2	0.358185
HSD17B14	0.358076
RAMP1	0.357983
NINJ1	0.357227
NUDT11	0.357161
ADCY2	0.357142
PPT1	0.356847
SV2A	0.356364
CSRP1	0.356336
SNX18	0.356195
NAB2	0.355719
PHC2	0.355591
MACF1	0.355562
SERPINE1	0.355497
HSPB1	0.355337
BMP1	0.355193
C14orf132	0.353731
HSPB7	0.353719
CALB2	0.353345
MAN1C1	0.353243
WBP1L	0.353239
RTN2	0.35291
COL24A1	0.352752
EFHD1	0.352711
SHANK3	0.352585
COL4A2	0.352515
POPDC2	0.352442
ILK	0.352271
DEGS1	0.352143
ZSWIM8	0.35206
LAMA4	0.351801
SIRPA	0.350591
KLHL5	0.35046
MMP11	0.350305
GJA5	0.350299
CD83	0.350152
TCEAL3	0.350089
JAKMIP2	0.349532
SGIP1	0.349447
PDGFB	0.349323
ZNF385A	0.3493
FAT3	0.34922
GPX3	0.34899
FCN1	0.348756
ARHGAP23	0.348708
TANC2	0.34861
EPYC	0.348605
SIRPB2	0.348603
PECAM1	0.348602
ORAI3	0.348518
MCC	0.348465
TTYH2	0.348427
THEMIS2	0.348416
C1orf198	0.348034
PLXNC1	0.347933
FOXS1	0.347922
SH3PXD2A	0.347858
RAI14	0.347826
NCKAP1L	0.347737
C7	0.347687
DSTYK	0.347541
ALOX5AP	0.347491
CD37	0.347425
ABCA1	0.347117
KMO	0.347021
PXDN	0.346927
LCAT	0.346911
TFEC	0.346868
FBLN1	0.346747
IRF2BPL	0.346672
MYO1F	0.346589
DNM3OS	0.346433
CD4	0.346243
HS3ST3A1	0.345808
TGFB2	0.345779
C1QTNF6	0.345618
CAV2	0.345421
RHBDF2	0.345156
CD81	0.345055
PTHLH	0.344983
AAED1	0.344926
TMEM47	0.344762
C1QC	0.344706
LTBP1	0.344662
EDNRA	0.344249
ANGPTL2	0.344052
LOC374443	0.34358
ZCCHC24	0.343549
PODN	0.343454
STX17-AS1	0.343337
ITGB1	0.343258
MS4A4A	0.343224
CLEC7A	0.343045
PAPSS1	0.342606
ZBTB46	0.34257
ADAMTS5	0.342417
EPHA3	0.3424
SNAI2	0.342172
NCKAP5L	0.342025
PCDHB5	0.342014
CLEC2B	0.341582
DPYD	0.341411
ELK3	0.341166
RAB42	0.341166
GJC1	0.341133
HSPA6	0.341052
KIRREL1	0.341023
SNN	0.340132
HIP1	0.339811
SHISA4	0.339678
TRIM6	0.339611
HABP4	0.339178
DISP1	0.33867
RBPMS2	0.338513
PHYHIP	0.338454
MINDY2	0.33835
MKL1	0.338336
TIAM1	0.338291
CSGALNACT2	0.338185
MEIS3	0.338171
CHIT1	0.338144
WASF1	0.337979
LOC100506388	0.337849
SGCE	0.337738
ZFHX3	0.337665
SLFN11	0.337554
MEDAG	0.337448
SCRG1	0.337341
MCRIP1	0.337222
MAOB	0.33655
CD86	0.336357
IL18BP	0.336097
PLOD1	0.335827
BCL6B	0.335729
ANKDD1A	0.335656
CRTC3	0.335486
DCUN1D3	0.335365
TCF7L1	0.335321
LOC728392	0.335219
SSPN	0.335218
STX2	0.335194
CD300A	0.335093
EBF2	0.335009
DYSF	0.334898
RASGRP3	0.334554
FAM234B	0.334503
MAGEL2	0.334339
MAP4	0.333537
STOM	0.33351
CTSF	0.333504
FCGR2C	0.333349
ARHGAP1	0.333312
SLC43A3	0.333179
SH3BP5	0.332901
COL15A1	0.332639
NOG	0.332434
CD99	0.332432
GPR84	0.33241
DOCK4	0.332368
SKI	0.33233
LOXL2	0.332234
ZNF281	0.332122
MRC1	0.331974
TMEM119	0.331864
ZBTB20	0.331415
TLR5	0.331317
ITPKB	0.331298
SCPEP1	0.331253
FES	0.331125
RAB7B	0.331089
SGCD	0.331065
ANXA5	0.330988
LBH	0.330867
RUSC2	0.330822
OSMR	0.330821
LRRC17	0.330624
RARB	0.3305
NR2F2	0.330386
SPIN1	0.330307
ABHD4	0.3302
HAPLN3	0.330028
COL1A1	0.329996
PLA2G15	0.329979
LSP1	0.329771
COL12A1	0.329432
PHC1	0.329367
ANOS1	0.329314
FKBP7	0.329221
STEAP4	0.329001
ERG	0.328903
PPM1F	0.328828
SPSB1	0.328774
ZEB1-AS1	0.328752
WNK1	0.328707
STRADA	0.328254
SALL2	0.3279
HEY2	0.327896
TTBK2	0.327727
MAN2B1	0.327711
WDR19	0.327695
ARHGEF2	0.327598
DCSTAMP	0.327544
RNF24	0.327403
CBX6	0.326945
KIF3C	0.326769
OBSL1	0.326731
ETV1	0.326477
SUGCT	0.3264
ELOVL4	0.32639
NPR2	0.32634
A2M-AS1	0.326277
CCL18	0.326185
APBB2	0.326145
DIO2	0.32588
PNMA1	0.325787
MMRN2	0.3257
CD53	0.325605
TSPAN9	0.325529
HAMP	0.325485
HTR7P1	0.325336
FBLN5	0.325033
ULK1	0.325013
SIN3B	0.324813
CDYL2	0.324701
CTSK	0.324537
LINC01138	0.324485
TMEM255A	0.324462
PIP5K1C	0.324438
OSR1	0.324281
FMNL1	0.32428
FBXO32	0.324171
GATA3	0.323737
APCDD1L	0.323708
FPR3	0.323358
HCST	0.323321
CXCL12	0.323284
HCK	0.323275
GALNT15	0.323224
MMP9	0.322707
MEGF6	0.322586
KCNT2	0.322544
TWIST2	0.322519
NCOR2	0.322492
2020-03-01	0.322339
SLC24A3	0.322294
WDR91	0.322293
CARMN	0.322118
SNED1	0.321971
ITGA7	0.321915
GEM	0.321559
DCN	0.321335
KDELC1	0.321151
BBS9	0.320447
CHSY1	0.320397
FLT1	0.320315
ARHGAP10	0.320157
BLVRA	0.320154
UBTD1	0.320144
LMO3	0.32002
SPI1	0.319965
LOC101928716	0.319901
DLC1	0.319816
PDZRN4	0.319769
CORO2B	0.319561
WTIP	0.319537
IL1R1	0.319449
LILRB1	0.319362
SPARCL1	0.319319
TPP1	0.319237
EID2B	0.318841
HACD4	0.318839
SUCNR1	0.318676
HSD17B6	0.318433
C11orf68	0.318319
GNA12	0.318222
C1QTNF1	0.318216
MARK4	0.318174
ICAM1	0.318008
AGAP2-AS1	0.317881
TLR1	0.317769
STAB1	0.317708
MRGPRF	0.31739
SYNC	0.317214
THBD	0.317068
FKBP14	0.316894
MSANTD3	0.316669
RNF180	0.316406
CLU	0.316121
RIN3	0.315852
RASSF2	0.315658
SHC1	0.315417
MS4A7	0.315282
ZNF677	0.315209
DNAJC5B	0.315087
AP2M1	0.314334
KLHL21	0.314277
MAB21L2	0.314232
C8orf88	0.314173
RFLNB	0.314142
EVI2A	0.314018
PPEF1	0.314014
IGFBP5	0.314011
TCEAL7	0.314008
LST1	0.313875
SHISA2	0.313761
CTSD	0.313571
CLMP	0.313486
GPX7	0.313434
ALOX5	0.313425
NINJ2	0.313023
CD300LF	0.312983
HOXC9	0.312912
P3H3	0.312807
HECTD2	0.312748
NOTCH4	0.312638
BCL9L	0.312628
SEMA4C	0.312433
FTO	0.312305
LUM	0.312196
NDST2	0.312148
CSRNP2	0.312063
RARRES2	0.311903
DAPK1	0.31175
DOK6	0.31164
FLOT1	0.311611
RGS4	0.311535
QKI	0.311485
SLCO2B1	0.311402
IGFL2	0.311133
CASC15	0.310829
MS4A14	0.310695
VASN	0.310589
PLPPR4	0.310546
CAP2	0.310528
CLEC12A	0.310087
BHMT2	0.309941
ADA2	0.309851
TP73-AS1	0.309788
MMP2	0.309786
ABCC9	0.30967
TSHZ2	0.309231
FAM89B	0.309188
NOTCH2NL	0.309179
SOX17	0.30913
FCGR3B	0.308844
PTAFR	0.308716
ACVR1	0.308657
YPEL3	0.30858
SLC8A1	0.308332
MILR1	0.3082
PODXL	0.308148
ANK2	0.30786
LILRB2	0.307746
IL1RAP	0.307676
MYO9B	0.307644
HIVEP2	0.307634
GPX8	0.307634
MNDA	0.307589
LINC02544	0.307338
RORA	0.307
CD93	0.306917
DES	0.306757
PKN1	0.306329
NOD1	0.306311
MYLK	0.306282
AQP9	0.30625
SLA	0.306227
RNF130	0.306226
TTC28	0.306196
HOOK3	0.306078
ANXA1	0.30606
SIX4	0.30599
PREX1	0.305695
LOC101928409	0.305639
CUL7	0.305598
DOCK2	0.305307
MIR99AHG	0.305165
ARHGAP30	0.304812
NPC2	0.304744
DRAM1	0.304653
BST2	0.304648
DPEP2	0.304471
RERG	0.304288
EBF1	0.304188
JAM2	0.303477
C2orf40	0.303421
LDB2	0.303239
DPP7	0.303071
FAM46B	0.303026
FBXL2	0.302989
FRY	0.302805
CST6	0.302667
PARVA	0.302445
TNS3	0.302222
PNRC1	0.302112
PRRC2B	0.301891
ANGPTL1	0.301628
ARHGEF6	0.301322
SYNM	0.301285
PRNP	0.30115
MTSS1L	0.300968
UNC5B	0.300881
ARHGAP31	0.300829
C3orf18	0.300636
NATD1	0.300392
CGNL1	0.300266
PJA1	0.300203
CCL7	0.300174
RENBP	0.299677
CDR2L	0.299666
SLC47A1	0.299443
TSC22D3	0.299365
EGFL7	0.299354
PAM	0.299155
ZYX	0.299126
RAB2B	0.299064
DKK3	0.298872
ZFYVE1	0.298783
RTL5	0.298766
F8	0.298661
TYMP	0.298592
ARID5A	0.298548
ADAMTS16	0.29852
RGL1	0.298468
CSF2RA	0.298449
TMEM200C	0.29838
MAST4	0.298351
LAT	0.298349
CHST12	0.298322
PLCL1	0.298294
RBPJ	0.298197
2020-03-02	0.298025
MARVELD1	0.298008
ARL8A	0.297909
PLEC	0.297794
CPT1C	0.297525
FILIP1	0.297243
MAPKBP1	0.297137
GJA4	0.296997
CCDC9B	0.296981
CYB5R1	0.296684
ARAP1	0.296616
NRROS	0.296488
CA11	0.296384
RASL12	0.296349
IL10RA	0.296143
FKBP10	0.296108
ANKRD35	0.29605
CARD6	0.29598
GREM1	0.295917
SETBP1	0.295875
THBS1	0.295707
ZFP36L1	0.295422
PTK7	0.295201
PLK3	0.295187
LOC93429	0.294722
AIP	0.294548
CCL2	0.294402
ACP5	0.294391
SDC3	0.294309
CSRP2	0.294145
VCAM1	0.293948
RIMKLB	0.293929
CNPY3	0.293903
TMEM136	0.293862
DPT	0.293798
SAMD4A	0.293689
LRCH2	0.293668
FOXJ2	0.293639
CSTA	0.293589
ADGRL4	0.293517
PBXIP1	0.293515
AQP1	0.293473
HCLS1	0.293289
MS4A6A	0.293266
B3GALNT1	0.293221
RGMA	0.293182
ZNF449	0.293137
CNN2	0.292819
STX1A	0.292653
BICD1	0.292611
ZNF467	0.292438
FGD5	0.292236
CYBB	0.292194
RSPO3	0.292123
ZNF542P	0.292105
NLRP1	0.2918
RTN1	0.291798
PLPP3	0.291595
NTNG2	0.291528
RAI1	0.291394
LIMK1	0.291288
PCDHB16	0.291245
FAM171B	0.291094
ADGRF5	0.290988
PCDH12	0.290902
KRT80	0.290782
NEK9	0.290732
PCSK5	0.290374
CCR5	0.29027
PRAM1	0.290264
NRIP3	0.290135
RAB8B	0.290122
CASTOR3	0.290007
ITGB2-AS1	0.289875
LMO2	0.289814
KIAA1549L	0.289618
SLC9A9	0.289571
CXCR4	0.289405
LOC100507557	0.289359
GBGT1	0.289277
INPP4A	0.289271
CSPG4	0.289198
NPL	0.289198
ASAP1	0.288707
LINC01943	0.288674
IDUA	0.288651
GAA	0.288623
FGD2	0.288614
SGTB	0.288496
HES4	0.288463
CNP	0.288081
KCNMA1	0.288079
CCDC92	0.287842
DNAJB5	0.287763
SYNPO2	0.287761
COL4A1	0.287629
ADORA3	0.287559
KLF2	0.287532
NID2	0.287489
LRRK2	0.287385
S100A3	0.287225
HSPA12B	0.287191
MUM1L1	0.287186
CYP27C1	0.287097
ST8SIA1	0.287056
ZNF331	0.286872
CACNA1C	0.286729
CYBRD1	0.286667
CALCOCO1	0.286416
PCDHB4	0.286385
FMO1	0.286229
SRGAP2	0.286173
SACS	0.286155
KLHL22	0.285939
SHC2	0.285839
TSPAN2	0.285643
BTK	0.285531
CCDC102B	0.285481
SH2D3C	0.285446
ARHGEF10	0.285431
LINC00924	0.285416
KIAA1755	0.285291
TOR1AIP1	0.285171
LAMA5	0.285168
FNBP1	0.285083
KLK10	0.285046
ELFN1	0.284898
TNFAIP2	0.284869
TMEM25	0.284703
AASS	0.2847
TMEM121	0.284607
STAC	0.284521
AIDA	0.28449
LINC00973	0.284331
TBC1D19	0.284216
PGR	0.283985
TLR8	0.283848
SEC14L1	0.283539
ROBO3	0.283413
LAMA2	0.283294
CASQ2	0.283057
ZFP90	0.28304
VSIG10L	0.282922
CROCC	0.28288
RHOJ	0.28283
PIK3R5	0.28271
SRPX	0.282548
ITIH3	0.282548
ZNF618	0.282367
PLPP7	0.282314
APOBEC3G	0.282283
GGTA1P	0.282236
PLA2G5	0.282181
CRTAP	0.282143
TMEM52B	0.28212
RPS6KA2	0.282112
A2M	0.282086
IL21R	0.282061
PRRX2	0.282043
FILIP1L	0.282032
FCHSD2	0.281946
ANO6	0.281483
EGR3	0.281397
PDE2A	0.28133
TMEM86A	0.281164
ESAM	0.280989
ANGPTL4	0.280968
MAPKAPK2	0.280955
ID4	0.280781
CST2	0.280734
HAND2-AS1	0.280431
FAM49A	0.280364
ZNF436	0.280103
FGF19	0.280043
TMX4	0.279788
CORIN	0.279473
WISP2	0.279467
SALL4	0.279452
CD36	0.279088
BACH2	0.279085
KLF12	0.279013
SLC15A4	0.278831
LINC01798	0.278745
GPX1	0.278741
CAPRIN2	0.278508
RCBTB2	0.278442
SAV1	0.278418
EMILIN2	0.278383
HLA-DPB1	0.278298
RNF144A	0.278018
CHRDL1	0.277939
PLS3	0.277799
MAGEH1	0.277588
PLXNA1	0.277568
RTL8C	0.277537
GAB3	0.277435
SVEP1	0.277425
MAP6	0.277418
NFATC4	0.277082
ATXN1	0.276849
PNMA2	0.27675
DCAF5	0.276721
S100A11	0.27663
SMIM29	0.276571
GIMAP4	0.276474
FLI1	0.276332
IFI16	0.275942
COL5A3	0.275851
NLRC4	0.275706
ABLIM3	0.275451
GRAMD1B	0.275379
LINC00260	0.275318
FXYD5	0.275314
TGFBR1	0.275291
MTMR9	0.275248
ABL2	0.275233
ADAM19	0.275192
FLNC	0.275158
IKBIP	0.274959
TSPAN18	0.2749
ENPEP	0.274888
CLEC1A	0.274799
ITPR1	0.274722
KRT6A	0.27458
ATL3	0.27441
NBEA	0.274377
CRTC2	0.274155
GRB10	0.273914
SLFN12	0.273884
KIFC3	0.273737
SMTN	0.27368
MYO1G	0.273475
SLC41A1	0.273428
ADAMTS9-AS2	0.273178
FYB1	0.273116
DAAM2	0.27258
LCA5	0.272576
C9orf3	0.272516
ARHGEF25	0.272475
HOXB4	0.272471
SERPINI1	0.272443
LAMC2	0.272348
PLPPR2	0.272171
BVES	0.27204
CNTLN	0.271989
TMEM109	0.271985
ETS1	0.271674
STRA6	0.271619
KCTD11	0.271433
RGCC	0.271431
MYL6B	0.271239
FLJ32255	0.271211
PIK3IP1	0.27106
STAT5B	0.27103
IGSF21	0.27025
NLGN2	0.270117
NGFR	0.269885
LTC4S	0.269775
FBLN7	0.269761
PCDH17	0.269665
CSGALNACT1	0.269628
GABARAPL1	0.269529
USP20	0.26951
BCHE	0.269479
FAM120C	0.269469
RNF144B	0.269331
DAPK1-IT1	0.268774
PFDN5	0.268518
PTGER3	0.268039
PHYHD1	0.267919
TBCEL	0.26784
NBPF20	0.267767
TTYH3	0.267753
ITSN1	0.267573
COPS7A	0.267105
GPR65	0.267067
APOL3	0.267032
RGS3	0.266975
LOC101928429	0.266846
LINC00460	0.26669
CST7	0.266494
PRKACA	0.266464
ZNF382	0.266459
RBM43	0.266442
HEXA	0.266237
PSTPIP1	0.26622
CDH2	0.266045
LINC01278	0.265973
LOC100507642	0.265884
ARHGAP24	0.265873
PRKAB2	0.265654
PLEK	0.26557
FBXO10	0.265461
CDKN2A	0.265417
GAS6	0.265358
ELN	0.264862
GLIPR2	0.264837
ZFP37	0.264825
SLIT3	0.264768
PLXNA4	0.264696
KERA	0.264654
AP3M2	0.264652
CIART	0.264373
PELI3	0.264341
NXF1	0.264329
JAK3	0.264268
CMTM7	0.264229
MAP3K7CL	0.263752
FBXO42	0.263657
DYNC1H1	0.263645
PHACTR1	0.26328
CARD8	0.262969
MDFI	0.262906
LOC101927752	0.262838
EHBP1	0.262718
ABCA6	0.262587
S100A13	0.262586
TUBB2B	0.262581
MSLN	0.262532
PLCG2	0.262415
CX3CL1	0.262213
MCAM	0.262126
GZMH	0.262042
VWF	0.261882
CREM	0.261769
CALCRL	0.261652
IGSF6	0.261628
CD33	0.261627
PANX1	0.261585
PPP1R14A	0.261544
NAT14	0.261531
NUCB1	0.261505
DYRK3	0.261437
C8orf48	0.261418
GPX4	0.261379
SLC16A2	0.261266
FAM160B1	0.261117
SLC38A6	0.261109
HOXA4	0.260923
AGPAT1	0.260731
RASL11B	0.260685
TNFSF8	0.260624
TAGLN3	0.260528
SIX5	0.260486
LOC100499489	0.260347
C6orf15	0.260316
MX2	0.260304
DCTN1	0.260282
RABGAP1	0.260162
SLC4A3	0.260157
STARD9	0.260107
HAND1	0.260085
DCAF8	0.260065
ATP6V1F	0.259917
MYO7A	0.259857
MEG3	0.259836
TMEM273	0.259808
SLC35B4	0.259679
SLC6A1	0.259634
NACAD	0.259595
SH3TC1	0.259579
ADAMTSL2	0.259422
HTR2A	0.259403
LOC101927263	0.259298
IKZF4	0.259074
PPOX	0.259
NR3C1	0.258961
SLC16A6	0.258937
PTMS	0.258923
NRSN2	0.258874
TTLL1	0.258755
C1RL	0.25874
MYH11	0.258692
GSAP	0.258455
SORBS3	0.258324
MC1R	0.258215
CHD3	0.258132
FZD7	0.257821
CPQ	0.25777
LOC101927482	0.257482
RETN	0.257464
FNDC4	0.257388
NTSR1	0.257148
TMEM91	0.256918
RALGDS	0.256913
GPSM3	0.2567
NDN	0.256604
ATP6AP1	0.2566
CLIC2	0.256597
EOMES	0.256564
LRRC8C	0.25635
HDAC7	0.256221
CRY2	0.256193
SEMA3G	0.256189
BMP8A	0.25612
HOXC10	0.255971
GLI1	0.255853
CLK2	0.255853
RAB13	0.255624
LOC154761	0.255539
TNNT1	0.255521
RNF187	0.255338
PTPRS	0.255161
ZNF641	0.255126
MYCBP2	0.255028
ZNF805	0.25502
PLK2	0.255017
EBF3	0.254998
GMFG	0.254906
AGAP3	0.254713
PLAU	0.254688
GPR161	0.254672
KLF7	0.254569
RDX	0.254473
ZMAT3	0.254351
KLHL20	0.254292
GOLGA8N	0.254283
BMPR2	0.254239
GBP2	0.254172
ZNF275	0.25413
RBPMS	0.254096
BNIP3L	0.254084
VCL	0.254055
SELENON	0.254046
SERPINB9P1	0.254042
CUEDC1	0.253912
FAM124B	0.253815
MSC	0.2538
CLEC4E	0.253619
CHRDL2	0.253562
LRCH1	0.253274
EPHB6	0.253251
PLXNA3	0.253152
CDC42BPA	0.253016
WNT2	0.253009
LINC00900	0.25291
KIAA1024	0.252889
RILPL2	0.252768
CEP85L	0.252678
CRELD1	0.252634
PRCP	0.252608
GABBR1	0.252601
CBL	0.25259
CSDC2	0.252543
CST4	0.252435
APLP1	0.252367
SLC35G2	0.252331
RASIP1	0.252297
INPP5F	0.252275
FCHSD1	0.252247
GPR85	0.252235
DEF8	0.252089
IGF1	0.252059
SVIL	0.252056
DUSP14	0.252034
RUFY3	0.252024
RNF115	0.251987
SHC4	0.251986
CCDC69	0.251935
RNF175	0.251876
ERC1	0.251872
LGMN	0.251663
CRTAM	0.251657
KLK6	0.251645
ZSCAN26	0.251584
GBP1	0.251547
ZNF512	0.251544
VPS11	0.251332
DYNC2H1	0.251207
GZMK	0.251173
BATF3	0.251075
PGM5	0.250959
LYL1	0.250952
LOXL1-AS1	0.250938
MSRB3	0.25093
WAS	0.250926
KCNAB2	0.250916
GLIPR1	0.250864
LCP2	0.250811
HIVEP3	0.250768
PLEKHF1	0.25062
HECW2	0.250431
GJA1	0.250044
LILRB3	0.250027
ABI2	0.250005
LIMCH1	0.249964
TMOD1	0.249826
FPR1	0.249678
XPC	0.249574
CD34	0.249393
USP35	0.249219
B3GNT9	0.248992
BRI3	0.24881
IL11RA	0.248767
NES	0.248669
WDFY4	0.248449
TRAF1	0.248405
PPFIBP1	0.24835
SUFU	0.248297
LOXL4	0.2482
TPST2	0.24808
LIPA	0.248071
SESTD1	0.247972
LY6E	0.247915
HLA-DMB	0.247838
CSF1	0.247821
APLNR	0.247754
SOX7	0.247687
HDAC6	0.247339
TFPI	0.247304
TMEM51	0.247192
ZFAND3	0.247136
CHRD	0.247087
NIN	0.247009
SLC26A10	0.246975
LINC00622	0.246928
FAM126A	0.246915
ARHGAP25	0.246789
FAM50A	0.246694
ABTB1	0.246686
PLTP	0.246353
AKAP13	0.246333
EML1	0.246243
CBLN3	0.246213
CYYR1	0.246143
SNX10	0.246068
HDGFL3	0.246058
CTSLP8	0.245904
TEAD1	0.24585
TBC1D2B	0.245784
WDR86	0.245736
SKIDA1	0.245705
YPEL5	0.245694
FAM198A	0.245679
STARD3	0.245667
IL17RD	0.245601
CTNS	0.24554
CX3CR1	0.245375
ECSCR	0.245334
SORCS2	0.245217
OSBPL8	0.24506
KCNQ1OT1	0.244844
MCHR1	0.244819
LMBR1L	0.244817
C19orf66	0.244815
ANXA2R	0.24481
MAP3K6	0.244787
BMPR1B	0.244704
BAHCC1	0.244682
CPEB1	0.244666
APH1B	0.244614
PDPN	0.24447
PTX3	0.244462
CMKLR1	0.244373
PHF13	0.244358
LEMD1	0.244318
PTPRZ1	0.244313
TNK2	0.244236
BCAM	0.244174
BMT2	0.243944
DCHS1	0.243893
LCP1	0.243879
PCED1A	0.243816
ATF5	0.243631
MPV17	0.24355
MIR4435-2HG	0.243427
ADAR	0.243376
TPBG	0.24318
OGN	0.243048
NCS1	0.242939
PCDHB15	0.242902
SPACA6	0.242883
GLG1	0.242825
SMOX	0.242681
RNASE6	0.242598
RASAL2	0.242555
SLC12A6	0.242545
CEBPB	0.242425
SAMHD1	0.242367
PTPN6	0.242235
NFKBIE	0.242029
CYBC1	0.241958
GABARAP	0.241773
NXPH3	0.241771
CLEC14A	0.241759
RECQL	0.241724
FKBP9	0.241473
CAV1	0.241462
VPS39	0.241274
PCOLCE2	0.241267
SPINK6	0.241254
SERTAD4-AS1	0.241225
CDH5	0.241086
P4HA1	0.241
BTN2A2	0.240867
HOXD8	0.240844
LMO4	0.240546
ARMCX6	0.240526
C11orf96	0.240512
MAP9	0.240458
ARHGAP29	0.240372
ITPRIPL2	0.240304
RHOBTB2	0.240284
RAB23	0.24021
ATP8B4	0.240179
MIR31HG	0.240175
LOC100287387	0.240154
PLA2G16	0.240139
DAB2	0.240136
ZNF428	0.240027
S1PR2	0.240025
CD74	0.239935
RAMP3	0.239865
DMPK	0.23969
SIGLEC10	0.23954
PPL	0.239451
SCUBE3	0.239438
GLMP	0.23942
CBX7	0.239373
RRAS	0.239238
PELO	0.239114
ST3GAL5	0.239069
IFITM2	0.238964
NUDT17	0.238847
ITGAV	0.238757
C1orf123	0.238754
GIMAP8	0.238661
TNC	0.238639
HEBP1	0.238636
TMEM132A	0.238499
TJAP1	0.238479
SEC31A	0.238446
ZNF300P1	0.238223
FERMT3	0.23822
CCNI	0.238167
EPM2A	0.23816
PODNL1	0.238149
DENND4B	0.238063
MEF2C	0.238042
HIGD1B	0.237844
APOL2	0.237769
ISG15	0.237745
BCL2A1	0.23773
MYH9	0.237706
LRRC25	0.237681
TTC9	0.237649
F5	0.237622
RGS17	0.237598
MFNG	0.237569
DNAJB4	0.237544
ZCCHC18	0.237441
F2R	0.237339
DOCK10	0.236986
OAZ2	0.236947
ADIPOQ	0.236789
PABPC5	0.236611
TROVE2	0.236577
RBM4B	0.236356
DYNC1I1	0.236315
SDCCAG8	0.236205
RHBDD2	0.236046
SUPT5H	0.236008
ADCY4	0.235839
HDAC5	0.235749
TNRC6C	0.235739
USP51	0.235627
BHLHE22	0.235521
LOC100507507	0.235491
LINC00847	0.235378
GSTO1	0.235364
SASH3	0.23535
IFI44	0.235235
HAS1	0.235216
SEMA7A	0.235129
CCL8	0.2351
PTPN12	0.234996
CCDC28B	0.234931
RYR3	0.234911
SLFN5	0.2349
ULBP2	0.23485
TDRD9	0.234844
LOC100129455	0.234769
SLC9B2	0.234737
CCDC102A	0.234672
ITGB1BP2	0.234452
BRD3OS	0.234387
PCNX1	0.23423
HLA-DQB1	0.234186
CELSR1	0.234108
PIM1	0.234036
TMOD2	0.233995
DPF2	0.233989
TMEM178A	0.233955
GULP1	0.233862
VAMP2	0.233826
SNAI1	0.2338
VAMP1	0.233581
DUSP22	0.233466
ZNF826P	0.233348
TTLL11	0.233224
CD82	0.23317
NDRG4	0.233059
CTF1	0.233006
WNT10A	0.232986
PRF1	0.232745
CASTOR2	0.232588
LRP12	0.232513
SLC25A30	0.232383
ITGAL	0.23236
BHLHE40	0.232278
GPR146	0.232112
FTL	0.231879
LINC02081	0.231858
ZMYND15	0.231838
C8orf34	0.2318
CST1	0.231793
POGZ	0.231778
LRP1	0.231733
NEFH	0.231662
YPEL4	0.231615
YEATS2	0.231594
PPP1R9B	0.231488
FZD2	0.231449
TULP3	0.231317
ACSS3	0.231217
ZNF580	0.231163
ENTHD1	0.230947
TEAD2	0.230944
INTU	0.230803
MTCL1	0.23039
APOL1	0.230297
NSMCE3	0.230276
RGL2	0.23005
PRPH2	0.229752
MCOLN1	0.22975
SGSM2	0.229728
TMTC1	0.229692
DUSP4	0.229663
ZNF32	0.229662
PPP3CC	0.229647
HSPA12A	0.229601
CBLB	0.229592
ZHX2	0.229584
SUPT3H	0.229449
DLG5	0.229434
WDR6	0.229375
NBDY	0.229319
EEF1AKMT3	0.229281
COL14A1	0.229253
AMOTL2	0.229253
ADAMTS14	0.229249
H1FX	0.228941
PGBD1	0.228837
TBC1D17	0.228791
ICA1L	0.228448
SCN1B	0.228375
BEX4	0.228262
PALM2	0.228158
MTR	0.228135
PKD2L1	0.228128
FBXO17	0.228019
UBE2H	0.228017
TCHH	0.227979
SOX13	0.227978
RUNX3	0.227884
SLC22A17	0.227772
CYGB	0.227749
ITGA10	0.227723
FAM78A	0.227668
NINL	0.227618
CHN1	0.227584
C6orf48	0.227464
MARF1	0.227429
CAMK1	0.227428
COLGALT1	0.227336
HLA-DPA1	0.227306
MAX	0.227189
GNA15	0.22708
IER5	0.227013
TMEM163	0.2267
PCDHB14	0.226698
TWSG1	0.226698
PLXNB3	0.226673
ZFAND5	0.226652
DIXDC1	0.226644
PAQR7	0.226586
LZTR1	0.226482
SKAP1	0.226176
PHF11	0.225761
TGM2	0.225747
DUBR	0.225736
PLCB2	0.225574
SOBP	0.225539
SIPA1	0.225417
CCL21	0.225308
FAM167B	0.225288
AGRN	0.225219
GRIPAP1	0.225185
CDH6	0.225149
B3GAT3	0.225091
TSPYL4	0.225079
WFS1	0.225052
FLII	0.224956
DEAF1	0.224877
ANTXR2	0.224836
IFI44L	0.224835
SDS	0.224695
TEAD3	0.224677
AHDC1	0.22449
LPP	0.224352
ACTG2	0.224325
RRAD	0.224297
ERCC1	0.22422
LPXN	0.224204
EXOC7	0.224202
SOX18	0.22418
ZNF423	0.224146
UBE2Q2L	0.224141
PHTF2	0.224136
CNTN1	0.224058
KYAT1	0.224045
KLRD1	0.223895
CCDC3	0.223866
KLF11	0.223865
KCNN3	0.223812
EML3	0.223706
EYA4	0.223612
ROR1	0.223513
PRKG1	0.223408
SLC16A4	0.223381
SUSD6	0.223297
MAMLD1	0.223275
SSBP2	0.223166
GRN	0.223103
XAF1	0.222932
IFIT2	0.222885
SLC25A29	0.222882
BMF	0.222819
L3MBTL3	0.222535
SLC39A6	0.222467
GBP5	0.222395
TRIM22	0.222318
ARL4D	0.222311
ZNF503	0.222293
UBQLN2	0.222269
CAPG	0.222232
LINC00623	0.222162
MAD1L1	0.222139
ST3GAL1	0.222121
VSTM4	0.22193
PKM	0.221844
CLEC4A	0.22178
MORN4	0.221688
GPM6B	0.221636
S100A2	0.221629
ATOX1	0.221556
DDIT4L	0.221518
TBC1D13	0.221437
SH3BGR	0.221134
EFNB3	0.221035
MYCT1	0.220952
GRAMD1A	0.22095
STXBP1	0.220879
MIAT	0.220763
STK32B	0.220668
ZNF697	0.220562
DNASE2	0.22039
GNB1	0.220381
PLXDC1	0.220293
COLGALT2	0.220277
ABCA3	0.220217
SPRR1B	0.22013
SLC2A1	0.220112
VPS18	0.220098
RGS2	0.219993
PLAUR	0.219942
ULK2	0.219885
AGO3	0.219574
MGARP	0.219535
PCDHB11	0.219532
KIF7	0.219531
ARL2BP	0.219468
TIGD7	0.219431
CARTPT	0.219427
THAP8	0.219417
NFIC	0.219272
CD52	0.219106
RNF216	0.219077
HOXD-AS2	0.218827
TMEM150A	0.218792
ASB1	0.218585
LOC388692	0.218397
SRGN	0.218353
TXNDC15	0.218299
VAV1	0.21828
DIRAS3	0.21819
PAEP	0.218107
NAB1	0.217909
PRSS53	0.217868
P3H4	0.217584
KRT16	0.217561
LOC101926963	0.217559
DOCK8	0.217427
PTCHD1	0.217386
SCARA3	0.217352
HVCN1	0.217296
ANO1	0.217272
AJUBA	0.217252
APBB1	0.217127
TMED1	0.217111
EXTL3	0.217065
WDR47	0.216869
RELB	0.216762
ARPC1B	0.216676
NDP	0.216624
NECAP2	0.216555
TNN	0.216453
LINC00662	0.216282
YPEL1	0.216269
[truncated: 18,189 more rows]

## Sheet: Sheet 1
Supplementary Table 5. IRG risk score related genes in the TCGA and GSE39582 datasets.
TCGA			GSE39582
Gene	Correlation		Gene	Correlation
TIMP1	0.558189		CYP1B1	0.630477
PHYHIP	0.556975		TIMP1	0.580937
COMP	0.519782		COMP	0.571696
PRELP	0.514681		PRICKLE1	0.56684
C5orf46	0.507098		TGFB3	0.559398
CYP1B1	0.505551		VAT1	0.556412
LINC01638	0.491127		NOX4	0.544766
SFRP2	0.490828		KCNE4	0.541209
FAM43B	0.48706		OLFML2B	0.539971
CLDN11	0.486793		GFPT2	0.534137
LOC101928583	0.486793		MRAS	0.533757
NALCN	0.483174		SLIT2	0.533494
NPR3	0.481069		LAMP5	0.533439
HTR2B	0.480146		MIR100HG	0.531765
ZFHX4	0.47811		GAS1	0.531408
CILP	0.472095		DPYSL3	0.528332
PDLIM7	0.468655		SFRP2	0.527177
LRRC4C	0.466074		AEBP1	0.527174
KCNE4	0.465577		PTGIS	0.526643
GAS1RR	0.459775		THBS3	0.526153
TGFB3	0.457447		CERCAM	0.52571
ARHGEF25	0.45384		MSR1	0.524658
PRICKLE1	0.452234		NUAK1	0.522742
PTGIS	0.451984		TREM2	0.520823
PLIN4	0.450627		CCDC80	0.520425
NOX4	0.449912		MAP1A	0.519668
NGF	0.44958		COLEC12	0.519662
PTH1R	0.44928		BGN	0.51925
FOXS1	0.449209		LAMB2	0.517757
MGP	0.449105		P2RX7	0.517634
SLIT2	0.448505		ITGBL1	0.516607
CDO1	0.448269		HTR2B	0.512605
FABP4	0.445656		CMTM3	0.511919
PLA2G5	0.445251		MGP	0.511341
NGFR	0.445136		PLEKHO2	0.510681
FMO2	0.443528		PSAP	0.509432
LAMP5	0.441559		PTPN14	0.509336
AOC3	0.441158		COL10A1	0.508859
HAMP	0.440393		EFEMP2	0.508558
CDH2	0.440206		VEGFC	0.50842
ISM1	0.439624		MARCO	0.508264
NUDT10	0.439307		ZFHX4	0.508238
CILP2	0.439098		C5orf46	0.508195
GAS1	0.43886		JCAD	0.507903
BGN	0.438521		ECM2	0.50773
CCDC8	0.437915		SPOCK1	0.507387
LINC02381	0.437342		SERPING1	0.507144
MAP6	0.436965		COL8A2	0.506243
EBF2	0.436453		STON1	0.505757
ITGBL1	0.435706		CHST11	0.50553
PNMA8B	0.434074		ISM1	0.505173
THBS4	0.433315		S1PR3	0.504902
CPXM2	0.432264		GLIS2	0.503902
HSPB7	0.432103		PPP1R18	0.503836
PDZD4	0.431993		NTM	0.503826
HSPB2	0.428949		FSTL3	0.502477
VEGFC	0.427325		MLLT11	0.501847
HAND2	0.427261		VSIG4	0.501696
ACTA2	0.426093		THBS2	0.500891
NRK	0.426072		PDLIM7	0.500817
CALB2	0.425872		PRDM6	0.50029
MATN3	0.425715		ZG16	-0.503677
LINC02544	0.425184		GPA33	-0.510838
FHL3	0.424581		SLC4A4	-0.511775
ADAMTS16	0.423572		TRPA1	-0.561422
ECM2	0.423367
CRYAB	0.423355
PRG4	0.42274
TAGLN	0.422366
THBS3	0.422026
VAT1	0.421723
SPOCD1	0.421372
CAVIN1	0.421172
CCDC80	0.420994
LINC01711	0.419261
AHNAK2	0.418959
SSC5D	0.418721
MEOX2	0.417828
POPDC2	0.41729
SUSD5	0.415797
SCG2	0.414908
UCHL1	0.414699
EXTL1	0.41404
SPOCK1	0.41334
FGF1	0.412596
KCNJ5	0.412572
WISP2	0.412396
BOC	0.41229
LZTS1	0.411876
NXN	0.411636
SFRP4	0.411257
YPEL4	0.411188
DEPP1	0.410749
P4HA3	0.410275
FGF14	0.409298
TNS1	0.409057
MRAS	0.408175
NACAD	0.407582
FXYD6	0.40753
PDE1B	0.407308
DGKI	0.407103
APOC1	0.405093
GLIS2	0.404977
FSTL3	0.404067
OSR1	0.404004
STON1	0.403805
CYS1	0.403708
PRDM6	0.403645
ABCC9	0.403425
GSDME	0.40321
DACT3	0.403106
OMD	0.402883
COL10A1	0.401631
GGT5	0.401506
AEBP1	0.401113
ZNF667.AS1	0.400595
CXCL3	-0.407091
GPR15	-0.408344
GSPT1	-0.40885
MMP10	-0.408925
TRIM40	-0.409305
CLCA4	-0.412114
HADH	-0.412851
DNASE1L3	-0.414592
C2CD4A	-0.417192
C4orf19	-0.418468
CXCL2	-0.419322
CLCA1	-0.427637
CASP5	-0.432975
NRG1	-0.440703
ITLN1	-0.443772
ZG16	-0.446809
CCL28	-0.447038
SALL1	-0.472227
TRPA1	-0.475909
